# Supplementary material
Source: PubMed Central journal article supplement (PMC7259909)
Supplement: mmc1.pdf [file mmc1.pdf]

# THE LANCET

## Rheumatology

### Supplementary appendix

This translation in French was submitted by the authors and we reproduce it as supplied. It has not been peer reviewed. *The Lancet's* editorial processes have only been applied to the original in English, which should serve as reference for this manuscript.

Cette traduction en français a été proposée par les auteurs et nous l'avons reproduite telle quelle. Elle n'a pas été examinée par des pairs. Les processus éditoriaux de *Lancet* n'ont été appliqués qu'à l'original en anglais, ce qui devrait servir de référence à ce manuscrit.

Supplement to: Huet T, Beaussier H, Voisin O, et al. Anakinra for severe forms of COVID-19: a cohort study. *Lancet Rheumatol* 2020; published online May 29. [https://doi.org/10.1016/S2665-9913\(20\)30164-8](https://doi.org/10.1016/S2665-9913(20)30164-8).

## Traitement par anakinra pour les formes sévères de COVID-19 : une étude de cohorte

### Résumé

#### Contexte

Les coronavirus peuvent stimuler la production d'interleukine (IL)-1 $\beta$ , IL-6, tumor necrosis factor, ainsi que d'autres cytokines, impliquées au cours des pathologies auto-inflammatoires. Il a été postulé que l'anakinra, un antagoniste recombinant spécifique du récepteur de l'IL-1, pourrait aider à neutraliser l'état hyperinflammatoire lié au *Severe Acute Respiratory Syndrome Coronavirus 2* (SARS-CoV-2), considéré comme l'une des causes de détresse respiratoire aiguë chez les patients atteints de COVID-19. Nous avons décidé d'évaluer l'intérêt de l'anakinra, prescrit en dehors des indications officielles, chez des patients hospitalisés pour une forme sévère de COVID-19, avec une symptomatologie indiquant une aggravation de leur fonction respiratoire.

#### Méthodes

L'étude Ana-COVID a porté sur une cohorte prospective et une cohorte historique rétrospective (initiée le 18 mars 2020), toutes deux recrutées au sein du Groupe Hospitalier Paris Saint-Joseph. Les patients ont été inclus dans la cohorte prospective à condition d'être âgés de plus de 18 ans et d'être hospitalisés au sein du Groupe Hospitalier Paris Saint-Joseph pour une pneumopathie bilatérale attribuée au COVID-19, confirmée soit par une positivité de la recherche du SARS-CoV-2 sur écouvillonnage nasal, soit par un aspect typique sur un examen tomodensitométrique pulmonaire. Les autres critères d'inclusion étaient soit une saturation en oxygène  $\leq 93\%$  sous oxygène  $\geq 6$  L / min, soit une aggravation (définie par une saturation  $\leq 93\%$  sous oxygène 3 L / min) avec une perte de 3% de saturation en oxygène dans l'air ambiant au cours des dernières 24 heures. Les patients inclus dans le groupe contrôle historique répondaient aux mêmes critères d'inclusion. Les patients du groupe anakinra ont été traités par anakinra sous-cutané (100 mg deux fois par jour pendant 72 heures, puis 100 mg par jour pendant 7 jours), en complément du traitement standard mis en place au sein de l'institution. En dehors de l'anakinra, les patients du groupe historique ont reçu le même type de traitement standard. Le principal critère d'évaluation était une combinaison de soit l'admission en unité de soins intensifs (USI) pour une ventilation mécanique invasive soit le décès. L'analyse principale a été effectuée en intention de traiter (en incluant tous les patients du groupe anakinra, ayant reçu au moins une injection d'anakinra).

#### Résultats

Entre le 24 mars et le 6 avril 2020, 52 patients ont été inclus dans le groupe anakinra. Au sein de la cohorte COVID historique 44 patients contrôles ayant les mêmes critères d'inclusion ont été identifiés. Le critère principal "admission en soins intensifs ou décès" a été enregistré chez 13 (25,0%) des patients du groupe anakinra contre 32 (72,7%) des patients du groupe historique (hazard ratio, 0,22 ; IC 95%, 0,11 à 0,41;  $P < 0,0001$ ). L'effet du traitement est resté significatif dans l'analyse multivariée (hazard ratio, 0,22 ; IC 95%, 0,10 à 0,49;  $P = 0,0002$ ). Une augmentation des transaminases hépatiques est survenue chez sept (13%) patients du groupe anakinra et quatre (9%) patients du groupe historique.

#### Interprétation

L'anakinra a réduit à la fois le besoin de ventilation mécanique invasive en USI et la mortalité, chez les patients atteints de formes sévères de COVID-19, sans effets secondaires graves. Une confirmation de l'efficacité de cette procédure thérapeutique devra faire l'objet d'études contrôlées.
